# Supplementary material
Source: PubMed Central journal article supplement (PMC3435165)
Supplement: 1120062109_pnas.201120062SI.pdf [file 1120062109_pnas.201120062SI.pdf]

# Supporting Information

Tanaka et al. 10.1073/pnas.1120062109

**Table S1. TAR fusion PCR primer sequences**

| Primer    | Sequence                                                 | Tel region*          | Primer mix |
|-----------|----------------------------------------------------------|----------------------|------------|
| 2p_TAR    | 5'-GCA GCA CTG AAT ACT CAA AGT CAG ACA CGA GTT AGG-3'    | 2p                   | A, B       |
| 4pq_TAR   | 5'-GAG CTC CGT TTT CCT CTG CAG AGA CTT CG-3'             | 4p, 4q               | B          |
| 5p_TAR    | 5'-GAG TTG CGT TCT CTG TAG CAC AGA CCC TAA CAG-3'        | 5p                   | A, B       |
| 7q_TAR    | 5'-GCT TTG ACA CGA CTC GGG GCT TCA TTG ATG GTG-3'        | 7q, 12q              | A, B       |
| 11q_TAR   | 5'-GCC ACC CGC CAA TAC ATT TGG AGC AAG AGG-3'            | 11q                  | A          |
| 17p_ter   | 5'-GGG ACA AGG CAA TTG TCA TGC AAT TAT CTA TGC AGG-3'    | 17p                  | A, B       |
| 18p_TAR   | 5'-GCA GCC CTC AAC AAT CAG GGT CAG AGT CCA G-3'          | 18p                  | A, B       |
| p-arm_TAR | 5'-GCC GTG CGA CTT TGC TCC TGC AAC ACA CG-3'             | 1p, 9p, 16p, 15q, Xq | A          |
| q-arm_TAR | 5'-GCC TTT GCG AGG GCG GAG TTG CGT TCT CTT TAG-3'        | 1q, 10q, 19q, 21q    | B          |
| Xp_ter    | 5'-GAA CTG TGT TAC AGA CCA GGA GCT CAT GTA CAG GGC TG-3' | Xp                   | A, B       |

\*Primer anneals at single or multiple chromosome end regions. See Fig. 1B for additional details.

**Table S2. Ductal carcinoma in situ tissues**

| Sample | Age, y | Cribriform | Nuclear grade | Comedo necrosis | Microcalcification | Extends to lobules | ER/PR/HER2                                          | Telomerase activity | Telomere fusion |
|--------|--------|------------|---------------|-----------------|--------------------|--------------------|-----------------------------------------------------|---------------------|-----------------|
| 1      | 30     | Yes        | 3             | Yes             | Yes                | No                 | ER <sup>+</sup> /PR <sup>±</sup>                    | +                   | +               |
| 2      | 36     | Yes        | 3             | Yes             | Yes                | No                 | ER <sup>-</sup> /PR <sup>-</sup> /HER2 <sup>+</sup> | +                   | +               |
| 3      | 37     | Yes        | 3             | No              | Yes                | No                 | NA                                                  | -                   | -               |
| 4      | 43     | Yes        | 3             | Yes             | No                 | Yes                | NA                                                  | +                   | -               |
| 5      | 44     | Yes        | 2             | Yes             | Yes                | No                 | NA                                                  | -                   | -               |
| 6      | 46     | Yes        | 3             | Yes             | Yes                | Yes                | NA                                                  | +                   | -               |
| 7      | 47     | Yes        | 3             | Yes             | Yes                | No                 | ER <sup>-</sup> /PR <sup>-</sup> /HER2 <sup>+</sup> | +                   | +               |
| 8      | 48     | Yes        | 3             | Yes             | Yes                | Yes                | ER <sup>+</sup> /PR <sup>+</sup>                    | +                   | +               |
| 9      | 51     | No         | 2             | Yes             | Yes                | Yes                | ER <sup>+</sup> /PR <sup>+</sup> /HER2 <sup>-</sup> | -                   | -               |
| 10     | 51     | Yes        | 3             | Yes             | Yes                | Yes                | ER <sup>+</sup> /PR <sup>+</sup> /HER2 <sup>-</sup> | -                   | -               |
| 11     | 51     | Yes        | 3             | Yes             | Yes                | No                 | NA                                                  | +                   | -               |
| 12     | 55     | Yes        | 2-3           | No              | No                 | Yes                | NA                                                  | -                   | +               |
| 13     | 57     | Yes        | 3             | Yes             | Yes                | Yes                | NA                                                  | +                   | -               |
| 14     | 57     | No         | 2-3           | Yes             | No                 | No                 | NA                                                  | +                   | -               |
| 15     | 58     | Yes        | 3             | Yes             | Yes                | No                 | ER <sup>+</sup> /PR <sup>±</sup>                    | -                   | -               |
| 16     | 61     | Yes        | 3             | No              | No                 | No                 | NA                                                  | +                   | -               |
| 17     | 61     | Yes        | 3             | Yes             | Yes                | No                 | NA                                                  | +                   | -               |
| 18     | 62     | No         | 1             | No              | Yes                | No                 | NA                                                  | +                   | -               |
| 19     | 63     | Yes        | 3             | Yes             | Yes                | No                 | NA                                                  | +                   | +               |
| 20     | 64     | Yes        | 3             | Yes             | Yes                | No                 | NA                                                  | -                   | +               |
| 21     | 65     | Yes        | 2             | No              | Yes                | No                 | NA                                                  | -                   | -               |
| 22     | 70     | Yes        | 3             | Yes             | No                 | Yes                | ER <sup>±</sup> /PR <sup>-</sup>                    | +                   | -               |
| 23     | 70     | Yes        | 3             | Yes             | Yes                | No                 | ER <sup>-</sup> /PR <sup>-</sup> /HER2 <sup>+</sup> | +                   | +               |
| 24     | 71     | Yes        | 3             | Yes             | Yes                | No                 | NA                                                  | +                   | -               |
| 25     | 80     | Yes        | 3             | Yes             | Yes                | No                 | ER <sup>-</sup> /PR <sup>-</sup> /HER2 <sup>+</sup> | +                   | +               |

ER, estrogen receptor; HER2, human epidermal growth factor receptor 2; NA, not available; PR, progesterone receptor.

**Table S3. Invasive ductal carcinoma tissues**

| Sample | Age, y | Tubular score | Nuclear score | Mitotic score | Overall score | In situ components | AJCC staging (ref. 1) | ER/PR/HER2                                          | Telomerase activity | Telomere fusion |
|--------|--------|---------------|---------------|---------------|---------------|--------------------|-----------------------|-----------------------------------------------------|---------------------|-----------------|
| 1      | 31     | 3             | 2             | 1             | 6/9           | Yes                | pT2, N1, MX           | NA                                                  | +                   | -               |
| 2      | 31     | 1             | 2             | 1             | 4/9           | No                 | pT1a, N0, MX          | ER <sup>-</sup> /PR <sup>-</sup> /HER2 <sup>-</sup> | +                   | +               |
| 3      | 34     | 3             | 3             | 2             | 8/9           | Yes                | pT1c, N0, MX          | ER <sup>+</sup> /PR <sup>+</sup> /HER2 <sup>-</sup> | +                   | +               |
| 4      | 35     | 3             | 2             | 3             | 8/9           | Yes                | pT1c, N0, MX          | NA                                                  | -                   | +               |
| 5      | 38     | 3             | 3             | 1             | 7/9           | Yes                | pT2, N0, MX           | NA                                                  | -                   | -               |
| 6      | 39     | 3             | 2             | 2             | 7/9           | Yes                | pT1c, N1a, MX         | ER <sup>-</sup> /PR <sup>-</sup> /HER2 <sup>+</sup> | +                   | -               |
| 7      | 40     | 2             | 2             | 2             | 6/9           | Yes                | pT1b, N0, MX          | ER <sup>+</sup> /PR <sup>+</sup> /HER2 <sup>±</sup> | -                   | -               |
| 8      | 40     | 1             | 2             | 1             | 4/9           | Yes                | pT1a, N0, MX          | ER <sup>+</sup> /PR <sup>+</sup> /HER2 <sup>-</sup> | +                   | -               |
| 9      | 43     | 2             | 2             | 1             | 5/9           | Yes                | pT1a, N1, MX          | ER <sup>+</sup> /PR <sup>+</sup> /HER2 <sup>-</sup> | +                   | -               |
| 10     | 44     | 3             | 2             | 1             | 6/9           | No                 | pT1, N0, MX           | ER <sup>+</sup> /PR <sup>-</sup> /HER2 <sup>-</sup> | +                   | -               |
| 11     | 44     | 3             | 3             | 1             | 7/9           | Yes                | pT2, N0, MX           | ER <sup>+</sup> /PR <sup>+</sup> /HER2 <sup>+</sup> | +                   | +               |
| 12     | 45     | 3             | 2             | 2             | 7/9           | Yes                | pT2, N1a, MX          | ER <sup>-</sup> /PR <sup>+</sup> /HER2 <sup>-</sup> | +                   | +               |
| 13     | 45     | 3             | 3             | 3             | 9/9           | Yes                | pT3, N2, MX           | ER <sup>-</sup> /PR <sup>-</sup> /HER2 <sup>-</sup> | +                   | +               |
| 14     | 46     | 1             | 2             | 1             | 4/9           | Yes                | pT1b, N0, MX          | ER <sup>+</sup> /PR <sup>+</sup> /HER2 <sup>-</sup> | +                   | +               |
| 15     | 47     | 3             | 3             | 3             | 9/9           | No                 | pT3, N0, MX           | NA                                                  | +                   | +               |
| 16     | 50     | 3             | 2             | 1             | 6/9           | Yes                | pT1c, N0, MX          | ER <sup>+</sup> /PR <sup>+</sup> /HER2 <sup>-</sup> | +                   | -               |
| 17     | 50     | 3             | 2             | 1             | 6/9           | Yes                | pT1c, N0, MX          | ER <sup>+</sup> /PR <sup>+</sup> /HER2 <sup>-</sup> | -                   | -               |
| 18     | 55     | 2             | 2             | 1             | 5/9           | Yes                | pT2, N0, MX           | ER <sup>+</sup> /PR <sup>+</sup> /HER2 <sup>-</sup> | +                   | -               |
| 19     | 56     | 3             | 2             | 1             | 6/9           | Yes                | pT2, N1, MX           | ER <sup>+</sup> /PR <sup>+</sup> /HER2 <sup>-</sup> | +                   | -               |
| 20     | 57     | 2             | 2             | 1             | 5/9           | No                 | pT1c, N0, MX          | ER <sup>+</sup> /PR <sup>+</sup> /HER2 <sup>±</sup> | -                   | -               |
| 21     | 65     | 3             | 3             | 2             | 8/9           | Yes                | pT2, N1, MX           | ER <sup>-</sup> /PR <sup>-</sup> /HER2 <sup>-</sup> | +                   | -               |
| 22     | 73     | 3             | 2             | 2             | 7/9           | Yes                | pT3, N1, MX           | ER <sup>+</sup> /PR <sup>+</sup> /HER2 <sup>-</sup> | +                   | -               |
| 23     | 86     | 2             | 2             | 1             | 5/9           | No                 | pT1c, N0, MX          | ER <sup>+</sup> /PR <sup>+</sup> /HER2 <sup>-</sup> | -                   | -               |

AJCC, American Joint Committee on Cancer; ER, estrogen receptor; HER2, human growth factor receptor 2; NA, not available; PR, progesterone receptor.

1. Greene FL, et al., eds (2002) *AJCC Cancer Staging Manual* (Springer, New York), 6th Ed.
